# Supplementary material
Source: PubMed Central journal article supplement (PMC4313149)
Supplement: JCM.01061-14_zjm999093672so1.pdf [file JCM.01061-14_zjm999093672so1.pdf]

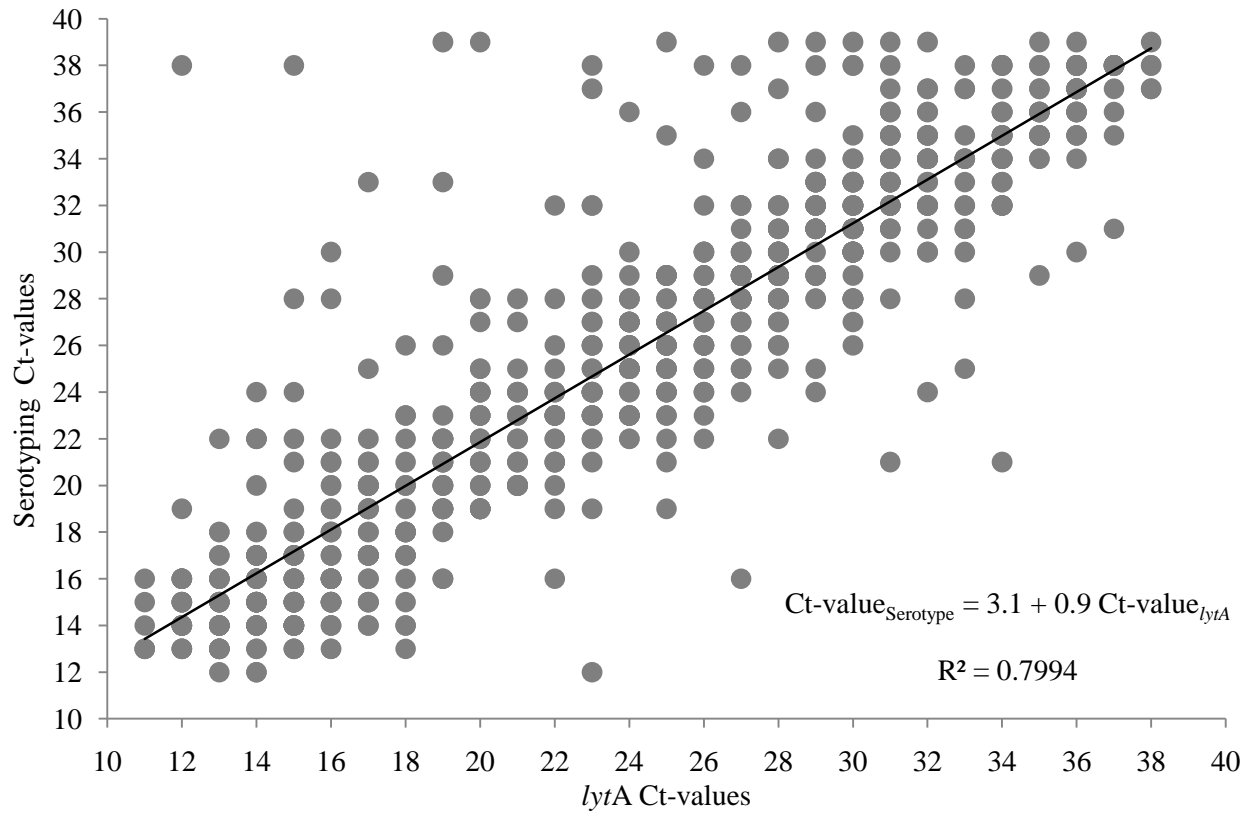

**Supplementary Figure 1.** Correlation between *lytA* Ct-values and serotyping Ct-values for culture-negative *Streptococcus pneumoniae* samples causing invasive disease in patients of all ages in South Africa from 2010 to 2012 (n=793). Individual sample Ct-values are indicated by dots and the linear correlation is indicated by the solid line.
